# Supplementary material
Source: PubMed Central journal article supplement (PMC5918429)
Supplement: NIHMS945065-supplement-312672_Acknowledgment_Permissions.pdf [file NIHMS945065-supplement-312672_Acknowledgment_Permissions.pdf]

## Circulation Research

---

**From:** Monica Justice <monica.justice@sickkids.ca>  
**Sent:** Monday, February 12, 2018 11:08 AM  
**To:** CircRes@circresearch.org; Fan, Yanbo  
**Subject:** Manuscript by Yanbo Fan CIRCRES/2018/312672D\_R1

Dear editors, I provided the floxed Tfeb mice for this study (**Endothelial TFEB positively regulates post-ischemic angiogenesis” CIRCRES/2018/312672D\_R1**), and give my permission to be acknowledged for their use.

Thank you,

Monica Justice

**Monica Justice, PhD** | Program Head and Senior Scientist  
**Genetics & Genome Biology Program, SickKids Research Institute**  
**Professor of Molecular Genetics, University of Toronto**  
**Canada Tier One Research Chair in Mammalian Molecular Genetics**  
**Editor-in-Chief, Disease Models and Mechanisms**  
**Fellow, American Association for the Advancement of Science**  
**The Peter Gilgan Centre for Research and Learning**  
**686 Bay St**  
**14th Floor, RM 14.9716**  
**Toronto, ON**  
**M5G 0A4**

**Tel: 416.813.7654 ext 309199**

**Fax: 416.813.4931**

**Email: [monica.justice@sickkids.ca](mailto:monica.justice@sickkids.ca)**

---

This e-mail may contain confidential, personal and/or health information (information which may be subject to legal restrictions on use, retention and/or disclosure) for the sole use of the intended recipient. Any review or distribution by anyone other than the person for whom it was originally intended is strictly prohibited. If you have received this e-mail in error, please contact the sender and delete all copies.
